# Supplementary material
Source: bioRxiv or medRxiv preprint supplement (https://www.biorxiv.org/highwire/filestream/56172/field_highwire_adjunct_files/0/156265-1.pdf)
Supplement: Supplementary file [file 156265-1.pdf]

Global DNA methylation, as estimated in blood samples, does not correlate with variations of body condition, anatomical features and hematological parameters in American bullfrogs (*Lithobates catesbeianus*) kept captive under distinct environmental conditions.

Braulio Ayala-García<sup>1\*</sup>, Alma L. Fuentes-Farías<sup>2</sup>, Gabriel Gutiérrez-Ospina<sup>1</sup>

<sup>1</sup>Systems Biology Laboratory, Departamento de Biología Celular y Fisiología, Instituto de Investigaciones Biomédicas. Universidad Nacional Autónoma de México, 04510, Ciudad de México, México.

<sup>2</sup>Animal Ecophysiology Laboratory, Departamento de Zoología, Instituto de Investigaciones Sobre Recursos Naturales, Universidad Michoacana de San Nicolás de Hidalgo, Morelia, Michoacán, Mexico.

### Supplementary material

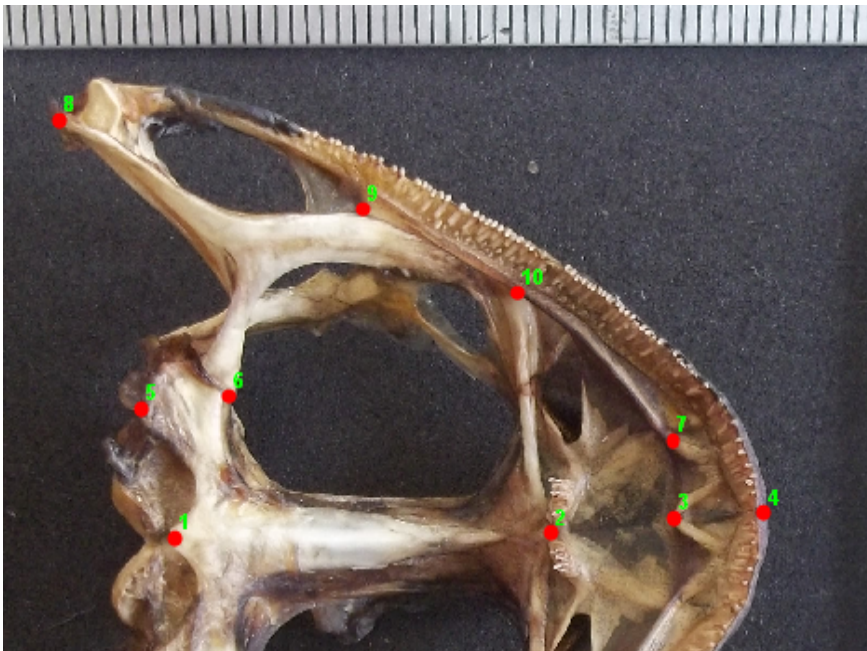

**Supplementary figure 1. Landmarck position in ventral view of skull.** Ten skulls from frogs of both sexes and localities (n=10), were cleaned with dissecting tools and using commercially bleach for a few minutes to avoid damage. Digital photographs from the ventral aspect of the skull were taken and used to place ten landmarks as suggested for the *Rana* genus by Larson, (Larson, 2002, 2005). Scale bars represent 1 mm.
